# Supplementary material for: Chain-shattering polymeric sulfur dioxide prodrug micelles for redox-triggered gas therapy of osteosarcoma
Source: Royal Society of Chemistry journal article supplement (doi:10.1039/d2tb00287f), 2022-01-01
Supplement: d2tb00287f1.pdf [file d2tb00287f1.pdf]

## Supplementary Materials

### Chain-Shattering Polymeric Sulfur Dioxide Prodrug Micelles for Redox-Triggered Gas Therapy of Osteosarcoma

Peng Liu,<sup>†,1,2</sup> Weifei Zhang,<sup>†,1,2</sup> Jiapeng Deng,<sup>1,2</sup> Yien Zheng,<sup>1,2</sup> Jian Weng,<sup>1,2</sup> Fei Yu,<sup>1,2</sup>

Deli Wang,<sup>1,2</sup> Ming Zheng,<sup>3</sup> Bin Kang,<sup>\*,1,2</sup> Hui Zeng<sup>\*,1,2</sup>

1. National & Local Joint Engineering Research Center of Orthopaedic Biomaterials,  
Peking University Shenzhen Hospital, Shenzhen, PR China, 518036.
2. Department of Bone & Joint Surgery, Peking University Shenzhen Hospital, Shenzhen,  
PR China, 518036.
3. Department of Physiology and Pathophysiology, School of Basic Medical Sciences,  
Health Science Center, Peking University, Beijing, PR China, 100191.

†: These authors contributed equally to this work.

To whom correspondence should be addressed

E-mail: [zenghui\\_36@163.com](mailto:zenghui_36@163.com); [szkangbin\\_12@sina.com](mailto:szkangbin_12@sina.com)

### ***Synthesis of compound 2.***

Compound 1 was synthesized according to the previous report. Compound 1 (5g, 12.6 mmol) and triethylamine (TEA, 2.63 mL, 18.9 mmol) were dissolved in 50 mL of dichloromethane (DCM). The mixture was stirred at 0°C, to which 2,4-dinitrobenzenesulfonyl chloride (5g, 18.9 mmol) was added. The reaction was allowed to proceed overnight at room temperature, after which the DCM was removed. The residue was purified by chromatography (hexane: ethyl acetate 10:1) to afford slightly yellow solid (yield 58%).

### ***Synthesis of DN***

Compound 2 (0.5 g, 0.79 mmol) was dissolved in 10 mL of methanol, and then *p*-toluenesulfonic acid monohydrate (31.8 mg, 0.16 mmol) was added. The mixture was stirred for 1h at room temperature, after which the methanol was removed. The residue was purified by chromatography (hexane: ethyl acetate 3:1) to afford white solid (yield 74%).

### ***Characterization***

Chemical structures of the synthesized products were characterized by <sup>1</sup>H NMR spectroscopy on a Varian 600 MHz spectrometer, using deuterated chloroform or dimethyl sulfoxide as solvent. The molecular weights distribution of mPEG<sub>2000</sub>-P(HDI-DN)<sub>20</sub> treated by GSH were characterized using a Waters' gel permeation chromatography (GPC) system equipped with a 2414 refractive index detector, and DMF as mobile phase at 35°C with a

flow rate of 1.0 mL/min. The size and zeta potential of micelles in PBS were measured by Malvern Zetasizer (Zetasizer Nano ZS). Critical micelle concentration (CMC) of mPEG-P(HDI-DN) micelles was determined using pyrene as fluorescence probe. The morphology of mPEG-P(HDI-DN) micelles was estimated by field emission transmission electron microscopy (JEOL JEM-2100F) after drying a drop of micelles solution on carbon-coated copper grids.

#### ***Detection of intracellular ROS by flow cytometry***

143B cells were seeded in a 6-well plate and cultured overnight at 37°C. The medium was replaced with fresh DMEM medium containing mPEG<sub>2000</sub>-P(HDI-DN)<sub>20</sub> micelles with different concentrations (0, 0.2, 0.4, 0.8 mg/ml). After co-incubation for 18 h, the cultural medium was removed. The cells were washed and stained with DCFH-DA following with protocol. Finally, flow cytometry was utilized to measure the fluorescence signal of each group.

#### ***Blood routine test***

Female BALB/c nude mice (4 weeks old) were purchased from Guangdong Medical Laboratory Animal Center. Animal care and handling procedures were in accordance with the guidelines evaluated and approved by the ethics committee of Shenzhen TopBiotech Co.,Ltd. The mice were randomly divided into 4 groups (n=4). Saline, mPEG<sub>2000</sub>-P(HDI-DN)<sub>20</sub> micelles (10 mg/kg), mPEG<sub>2000</sub>-P(HDI-DN)<sub>20</sub> micelles (20 mg/kg) and mPEG<sub>2000</sub>-

P(HDI-DN)<sub>20</sub> micelles (40 mg/kg) were given by subcutaneous injection, respectively.

After 3 days, the mice were sacrificed, and the blood was collected for blood routine test.

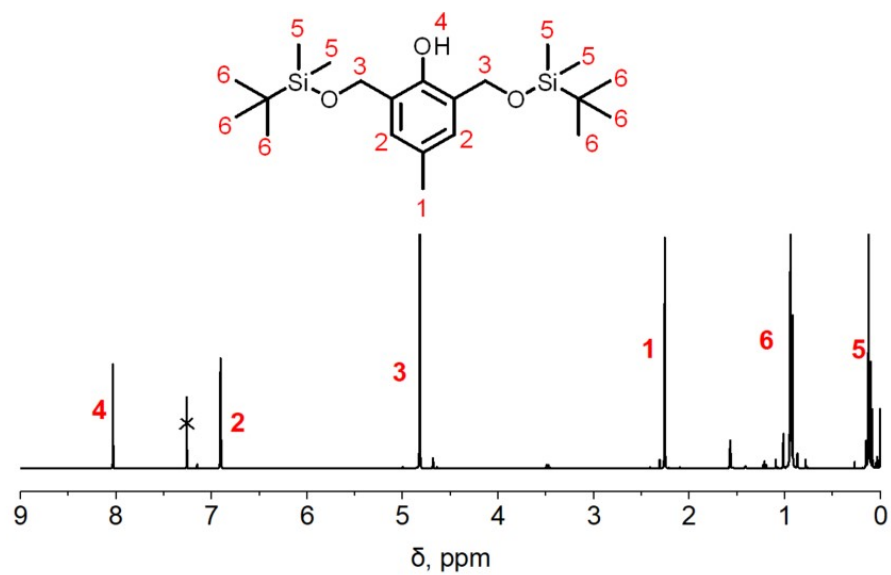

**Figure S1.** <sup>1</sup>H NMR spectrum of compound 1 in CDCl<sub>3</sub>.



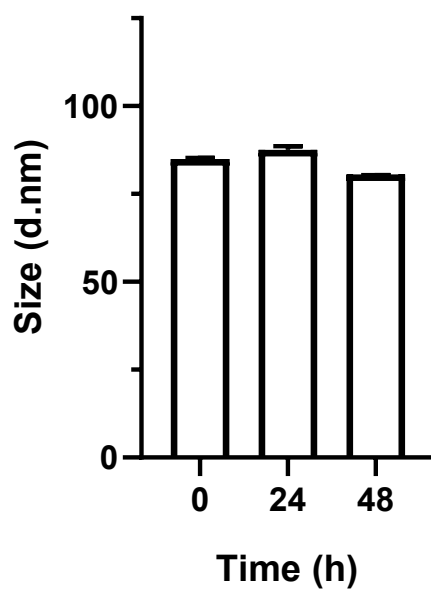

**Figure S4.** Size change of PEG<sub>2000</sub>-P(HDI-DN)<sub>20</sub> micelles at 37°C.

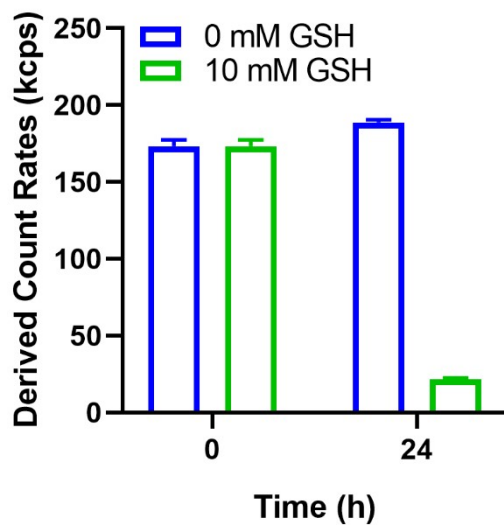

**Figure S5.** Derived count rates change of mPEG<sub>2000</sub>-P(HDI-DN)<sub>20</sub> micelles after received different treatments.

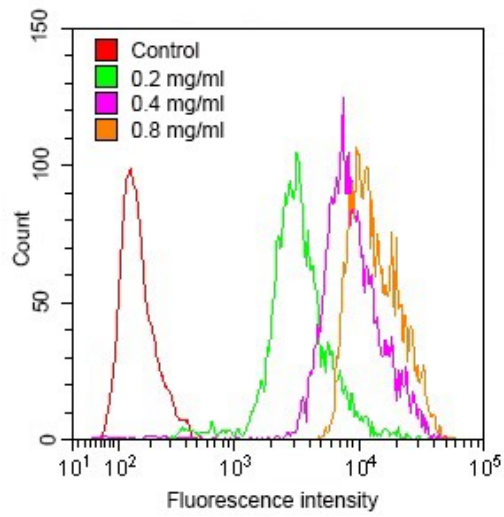

**Figure S6.** Cellular ROS level of 143B cells after treatment by mPEG<sub>2000</sub>-P(HDI-DN)<sub>20</sub> determined by flow cytometry.

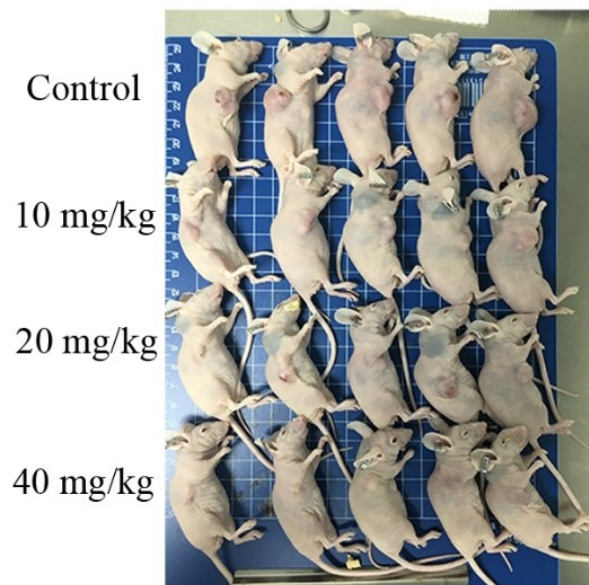

**Figure S7.** Photographs of mice after received different treatments for 16 days.

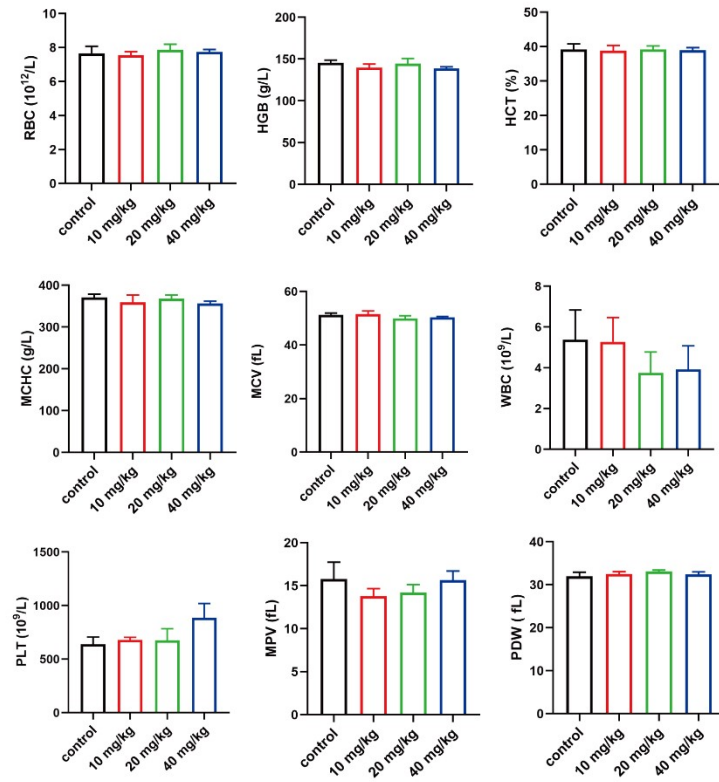

**Figure S8.** Routine blood tests of mice after received different treatments.
